# Supplementary material for: Platinum nanoparticles wrapped in carbon-dot-films as oxygen reduction reaction catalysts prepared by solution plasma sputtering
Source: Royal Society of Chemistry journal article supplement (doi:10.1039/d4na00818a), 2024-12-24
Supplement: d4na00818a7.pdf [file d4na00818a7.pdf]

## Supporting Information

### Platinum Nanoparticles Wrapped in Carbon-Dot-Films as Oxygen Reduction Reaction Catalysts Prepared by Solution Plasma Sputtering

Yuanyuan Liu,<sup>a</sup> Zhunda Zhu,<sup>a</sup> Pengfei Wang,<sup>a</sup> Zhuoya Deng,<sup>a</sup> Jiangqi Niu,<sup>b</sup> Yasuyuki  
Sawada,<sup>a,b</sup> and Nagahiro Saito<sup>a,b,c,d\*</sup>

<sup>a</sup>Department of Chemical Systems Engineering, Graduate School of Engineering, Nagoya University, Furo-cho, Chikusa-ku, Nagoya 464-8603, Japan;

<sup>b</sup>Institute of Innovation for Future Society, Nagoya University, Furo-cho, Chikusa-ku, Nagoya 464-8603, Japan;

<sup>c</sup>Department of International Collaborative Program in Sustainable Materials and Technology for Industries between Nagoya University and Chulalongkorn University, Graduate School of Engineering, Nagoya University, Furo-cho, Chikusa-ku, Nagoya 464-8603, Japan;

<sup>d</sup>Conjoint Research Laboratory in Nagoya University, Shinshu University, Furo-cho, Chikusa-ku, Nagoya 464-8603, Japan.

\*Corresponding Author: Nagahiro Saito: E-mail: [saito.nagahiro.z7@f.mail.nagoya-u.ac.jp](mailto:saito.nagahiro.z7@f.mail.nagoya-u.ac.jp)

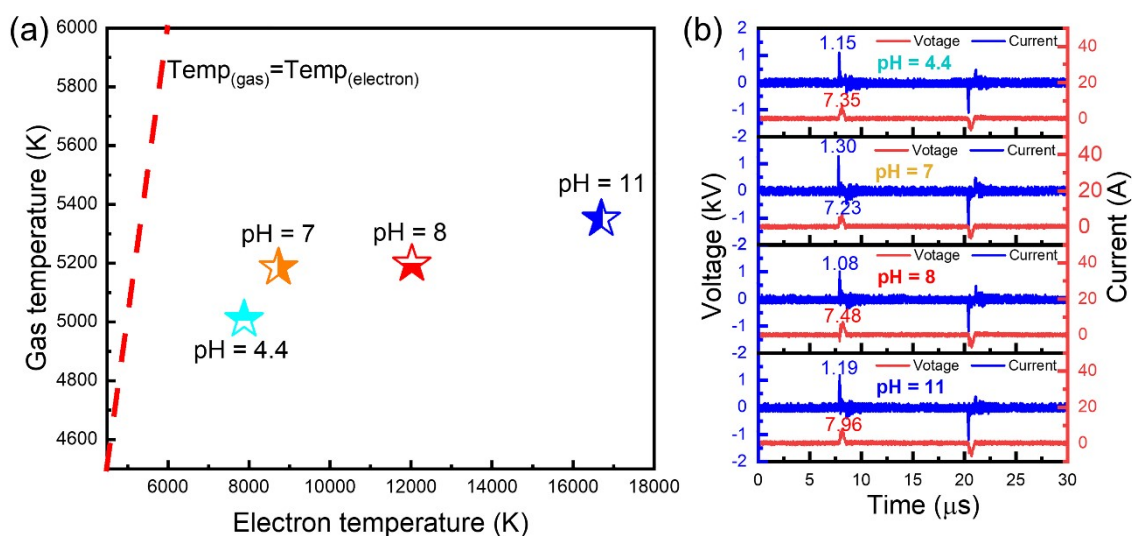

**Fig. S1.** (a) Relationship between gas temperature and electron temperature; (b) Current–voltage (I–V) curves in one cycle during discharge. The linear dashed line described by  $Temp_{(gas)} = Temp_{(electron)}$  show the equilibrium state.

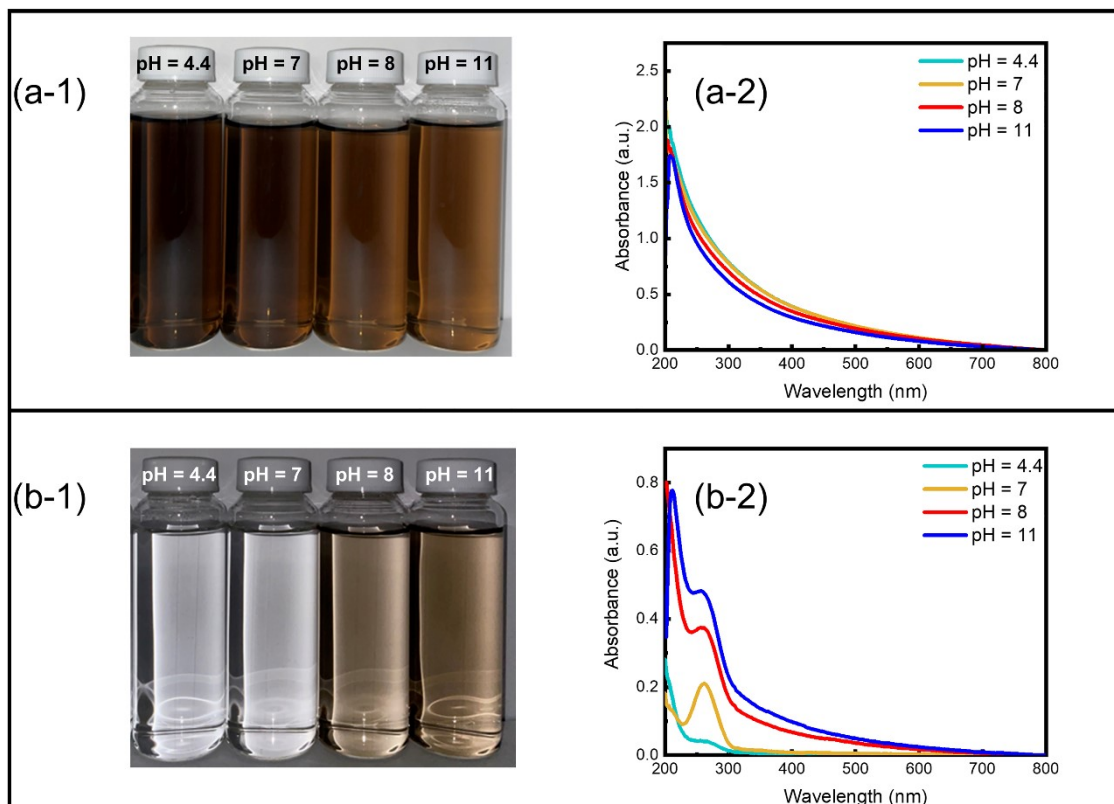

**Fig. S2.** (a-1) Solution photo after solution plasma sputtering; (b-1) Solution photo after 100,000 rpm ultracentrifugation; (a-2) and (b-2) Absorbance of (a-1) and (b-1), respectively.

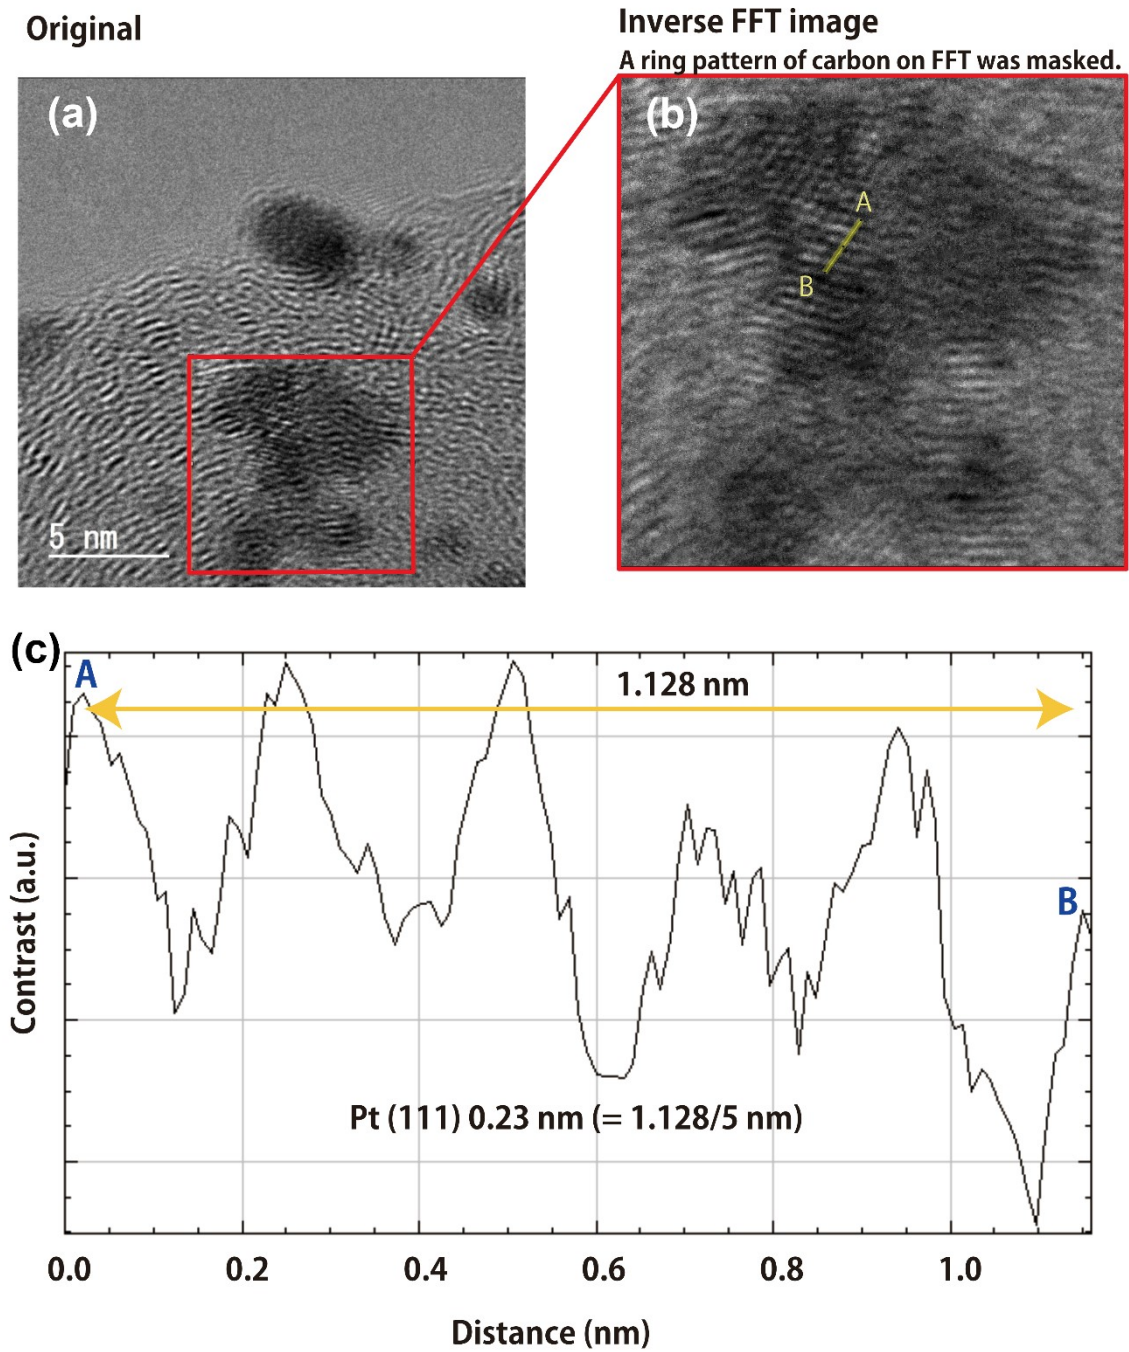

**Fig. S3.** TEM image of pH = 8. (a) original TEM image; (b) inverse Fourier Transform (FFT) after removing spatial frequencies from carbons on FFT, (c) the measurement results of the plane spacing.

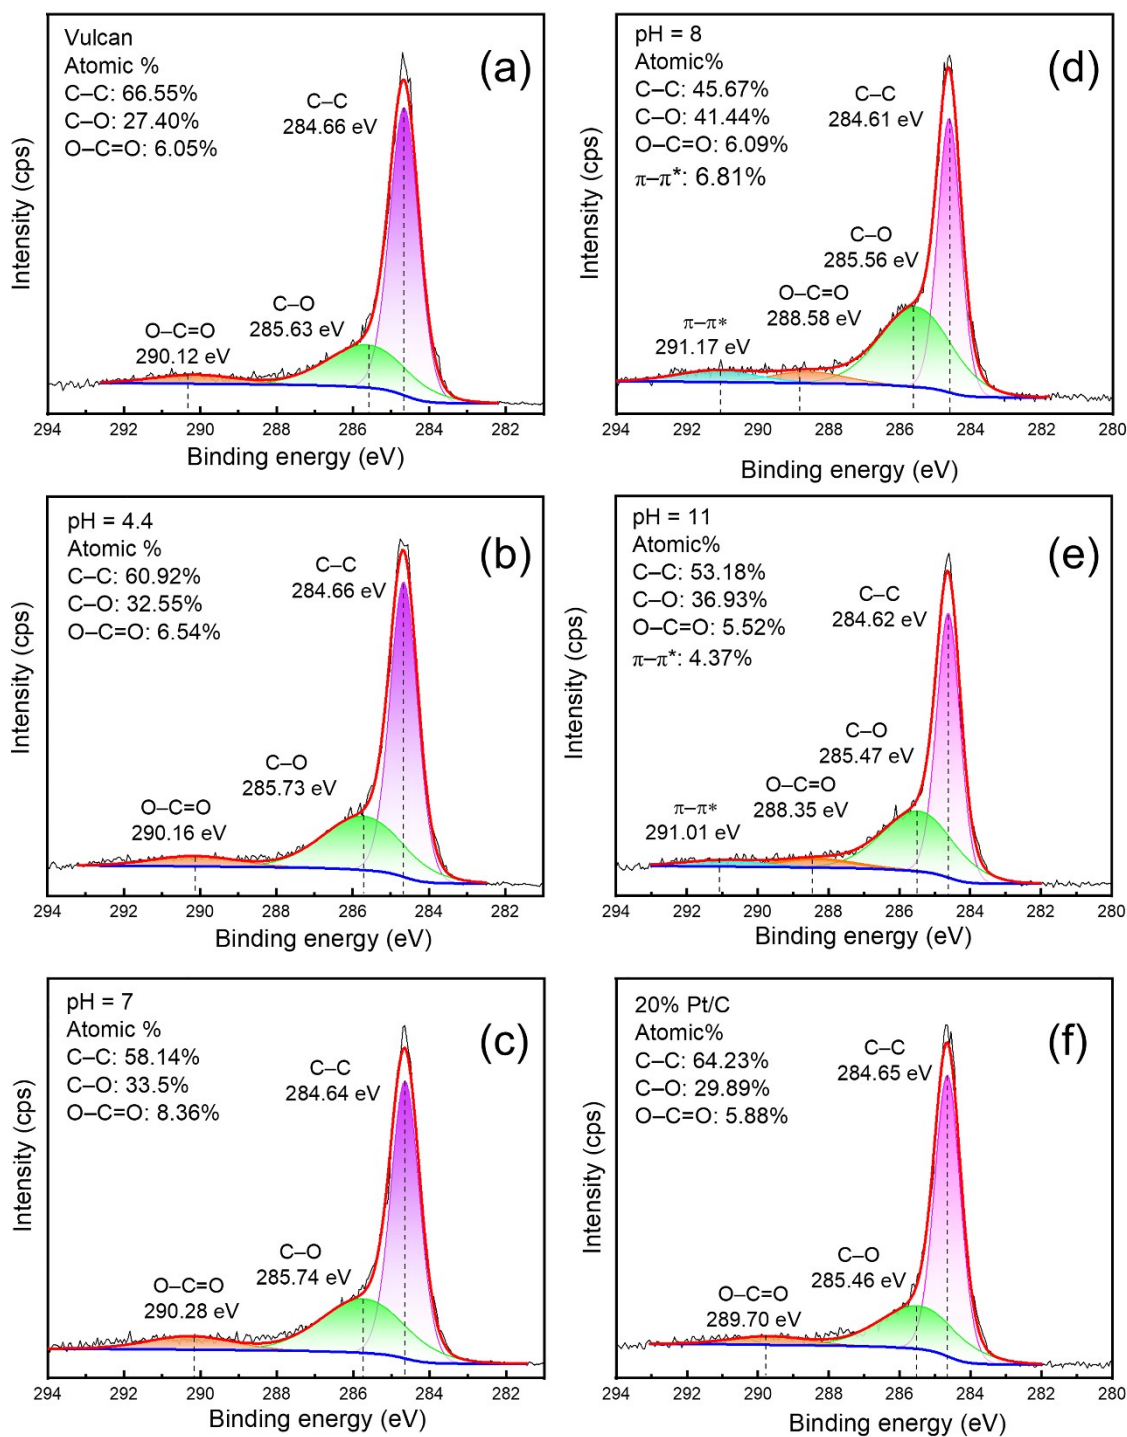

**Fig. S4.** X-ray photoelectron spectra of C 1s for the obtained catalyst with (a) Vulcan support; (b) pH = 4.4; (c) pH = 7; (d) pH = 8; (e) pH = 11; (f) 20 wt% commercial Pt/C obtained by the Gaussian deconvolutions.

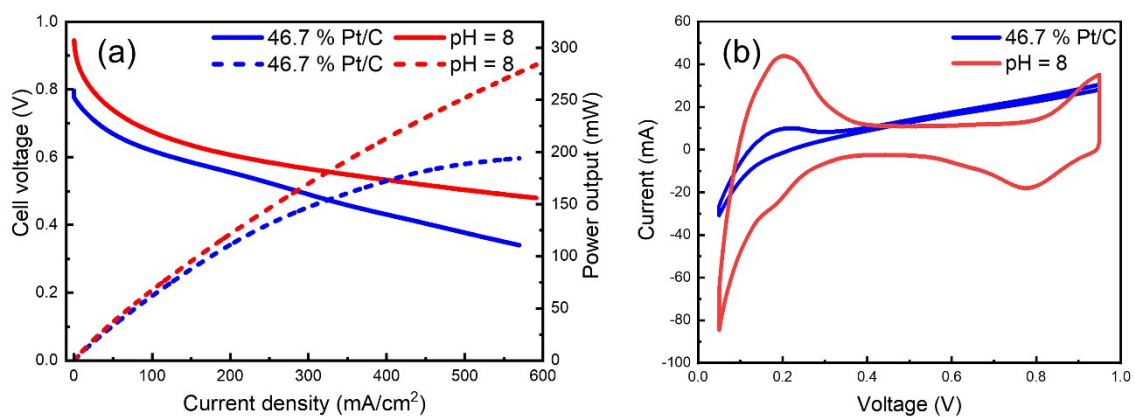

**Fig. S5.** Output performance of the fuel cell using commercial 46.7 wt.% Pt/C as an anode with the pH = 8 sample and commercial 46% Pt/C as the cathode. (a) I-V and power output curves under H<sub>2</sub>-O<sub>2</sub> atmosphere in membrane electrode assembly (MEA); (b) cyclic voltammetry curves under H<sub>2</sub>-N<sub>2</sub> atmosphere in MEA.

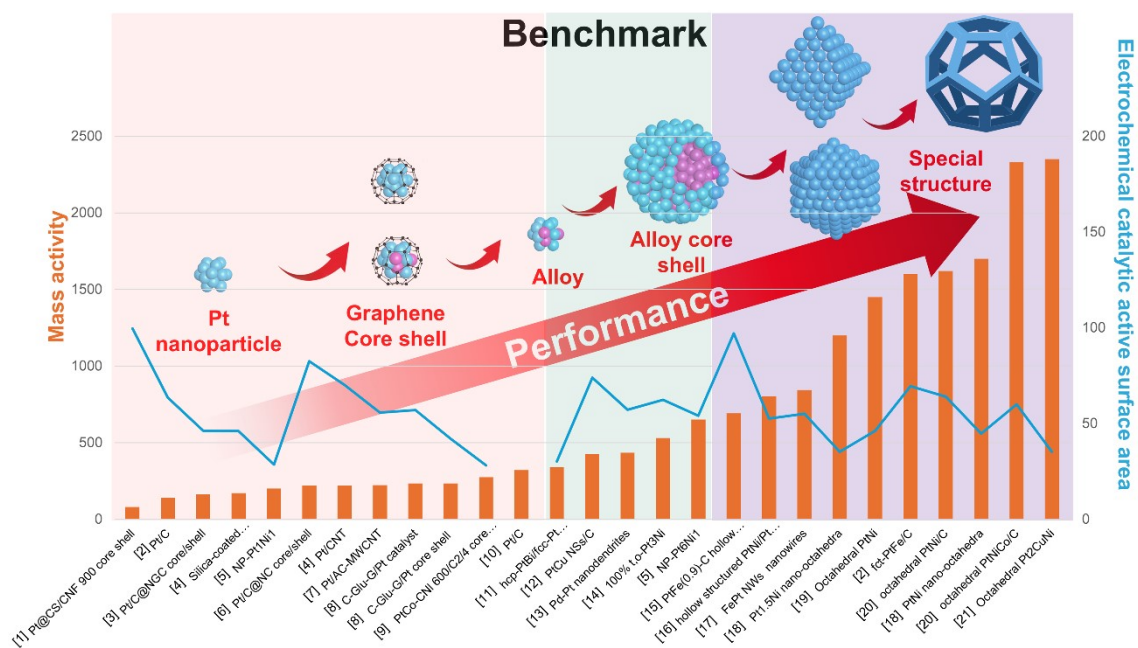

**Fig. S6.** Benchmark of the oxygen reduction reaction performance of different catalysts from references. <sup>1-21</sup>

**Table S1.** Ink composition for the membrane electrode assembly measurements.

|                               | <b>Weight (mg)</b> | <b>H<sub>2</sub>O (mg)</b> | <b>IPA (mg)</b> | <b>Nafion (mg)</b> | <b>Membrane<br/>thickness (μm)</b> |
|-------------------------------|--------------------|----------------------------|-----------------|--------------------|------------------------------------|
| Commercial<br>Pt/C (46.7 wt%) | 75                 | 600                        | 770             | 200                | 150 and 50                         |
| pH = 8 (Pt% =<br>8.4%)        | 30                 | 243                        | 310.7           | 135                | 350                                |



**Table S2.** Loading amount on electrodes and membrane electrode assembly measurement performances.

|                                   | <b>Anode</b>                                      | <b>Loading amount (<math>\mu\text{g}</math>)</b> | <b>Cathode</b>                                  | <b>Loading amount (<math>\mu\text{g}</math>)</b> | <b>ECSA (<math>\text{m}^2/\text{g}</math>)</b> |
|-----------------------------------|---------------------------------------------------|--------------------------------------------------|-------------------------------------------------|--------------------------------------------------|------------------------------------------------|
| <b>Commercial Pt/C (46.7 wt%)</b> | 150 $\mu\text{m}$<br>Commercial<br>Pt/C (46 wt.%) | 165                                              | 50 $\mu\text{m}$<br>Commercial<br>Pt/C (46 wt%) | 33.0                                             | Cannot be calculated                           |
| <b>pH=8 (Pt% = 8.4%)</b>          | 150 $\mu\text{m}$ 46%<br>Commercial<br>Pt/C       | 162                                              | 350 $\mu\text{m}$ pH = 8<br>Pt/C                | 20.4                                             | 223.20                                         |

## References

- 1 M. Karuppanan, Y. Kim, S. Gok, E. Lee, J. Y. Hwang, J.-H. Jang, Y.-H. Cho, T. Lim, Y.-E. Sung and O. J. Kwon, *Energy Environ. Sci.*, 2019, **12**, 2820–2829.
- 2 D. Y. Chung, S. W. Jun, G. Yoon, S. G. Kwon, D. Y. Shin, P. Seo, J. M. Yoo, H. Shin, Y.-H. Chung, H. Kim, B. S. Mun, K.-S. Lee, N.-S. Lee, S. J. Yoo, D.-H. Lim, K. Kang, Y.-E. Sung and T. Hyeon, *J. Am. Chem. Soc.*, 2015, **137**, 15478–15485.
- 3 Y. Nie, S. Chen, W. Ding, X. Xie, Y. Zhang and Z. Wei, *Chem. Commun.*, 2014, **50**, 15431–15434.
- 4 S. Takenaka, H. Miyamoto, Y. Utsunomiya, H. Matsune and M. Kishida, *J. Phys. Chem. C*, 2014, **118**, 774–783.
- 5 R. Wang, C. Xu, X. Bi and Y. Ding, *Energy Environ. Sci.*, 2012, **5**, 5281–5286.
- 6 H. Gao, S. Liao, Y. Zhang, L. Wang and L. Zhang, *Int. J. Hydrog. Energy*, 2017, **42**, 20658–20668.
- 7 N. Bhuvanendran, S. Ravichandran, K. Peng, Q. Xu, L. Khotseng and H. Su, *Appl. Surf. Sci.*, 2021, **565**, 150511.
- 8 W. Song, Z. Chen, C. Yang, Z. Yang, J. Tai, Y. Nan and H. Lu, *J. Mater. Chem. A*, 2015, **3**, 1049–1057.
- 9 V. D. Di Noto, E. Negro, A. Nale, P. J. Kulesza, I. A. Rutkowska, K. Vezzù and G. Pagot, *Electrocatalysis*, 2020, **11**, 143–159.
- 10 B. S. Mun, M. Watanabe, M. Rossi, V. Stamenkovic, N. M. Markovic and P. N. Ross, Jr, *J. Chem. Phys.*, 2005, **123**, 204717.

- 11 Y. Qin, M. Luo, Y. Sun, C. Li, B. Huang, Y. Yang, Y. Li, L. Wang and S. Guo, *ACS Catal.*, 2018, **8**, 5581–5590.
- 12 W. Li, Z.-Y. Hu, Z. Zhang, P. Wei, J. Zhang, Z. Pu, J. Zhu, D. He, S. Mu and G. V. Tendeloo, *J. Catal.*, 2019, **375**, 164–170.
- 13 B. Lim, M. Jiang, P. H. C. Camargo, E. C. Cho, J. Tao, X. Lu, Y. Zhu and Y. Xia, *Science*, 2009, **324**, 1302–1305.
- 14 J. Wu, J. Zhang, Z. Peng, S. Yang, F. T. Wagner and H. Yang, *J. Am. Chem. Soc.*, 2010, **132**, 4984–4985.
- 15 L. Gong, J. Liu, Y. Li, X. Wang, E. Luo, Z. Jin, J. Ge, C. Liu and W. Xing, *Chem. Eng. J.*, 2022, **428**, 131569.
- 16 J. Y. Jung, D. Kim, I. Jang, N. D. Kim, S. J. Yoo and P. Kim, *J. Ind. Eng. Chem.*, 2022, **111**, 300–307.
- 17 S. Guo, D. Li, H. Zhu, S. Zhang, N. M. Markovic, V. R. Stamenkovic and S. Sun, *Angew. Chem.*, 2013, **125**, 3549–3552.
- 18 C. Cui, L. Gan, M. Heggen, S. Rudi and P. Strasser, *Nat. Mater.*, 2013, **12**, 765–771.
- 19 C. Cui, L. Gan, H.-H. Li, S.-H. Yu, M. Heggen and P. Strasser, *Nano Lett.*, 2012, **12**, 5885–5889.
- 20 X. Huang, Z. Zhao, Y. Chen, E. Zhu, M. Li, X. Duan and Y. Huang, *Energy Environ. Sci.*, 2014, **7**, 2957–2962.
- 21 C. Zhang, W. Sandorf and Z. Peng, *ACS Catal.*, 2015, **5**, 2296–2300.
