# Supplementary figures and images for: Platinum nanoparticles wrapped in carbon-dot-films as oxygen reduction reaction catalysts prepared by solution plasma sputtering
Source: Royal Society of Chemistry journal article supplement (doi:10.1039/d4na00818a), 2024-12-24

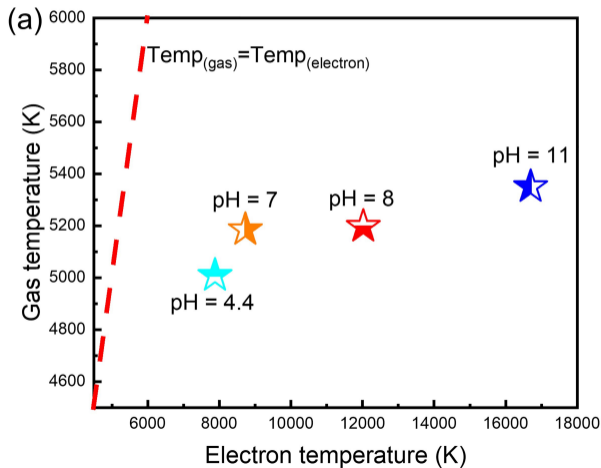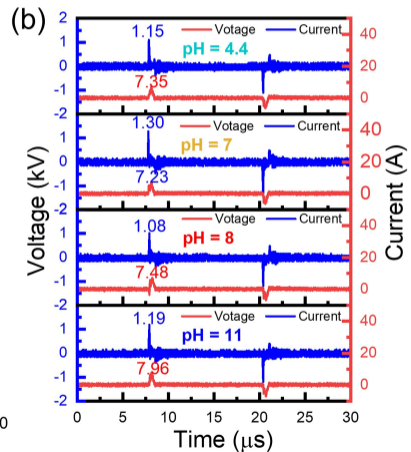

Supplement: d4na00818a1.pdf [file d4na00818a1.pdf]

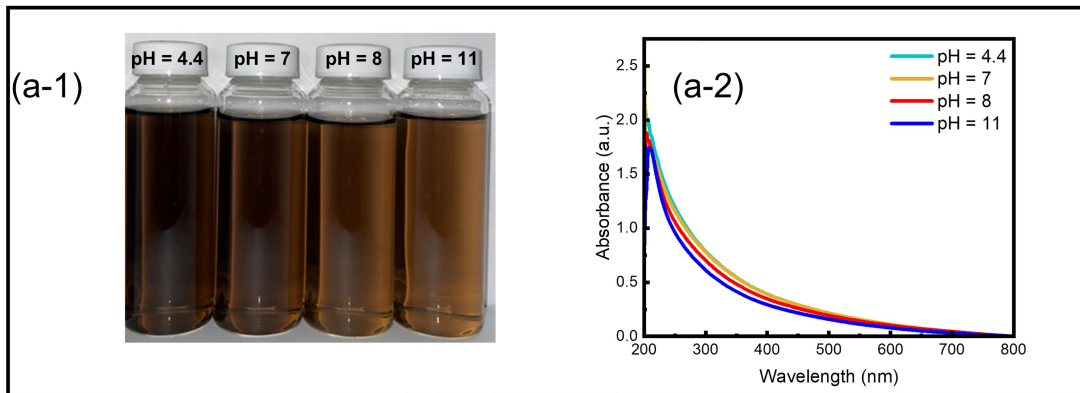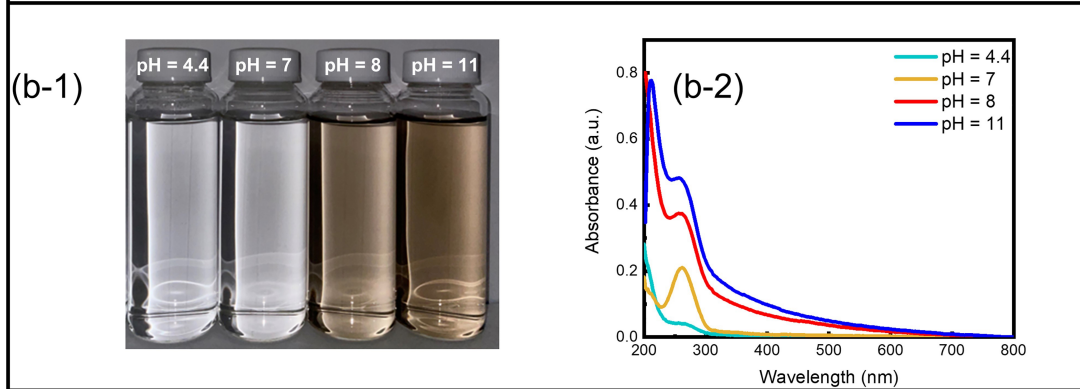

Supplement: d4na00818a2.pdf [file d4na00818a2.pdf]

### Original

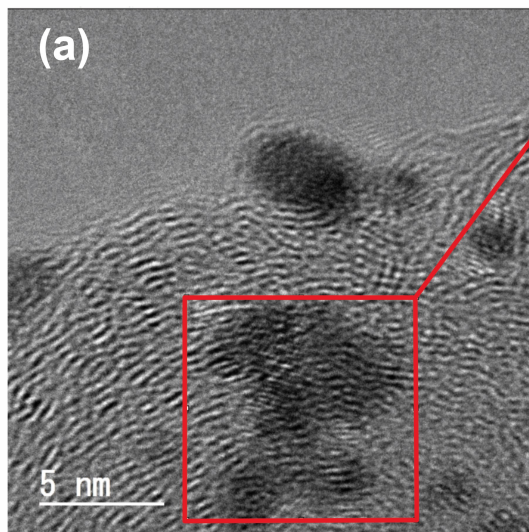

### Inverse FFT image

A ring pattern of carbon on FFT was masked.

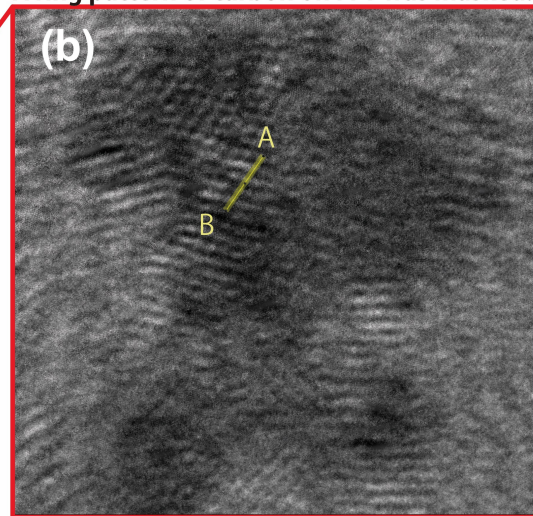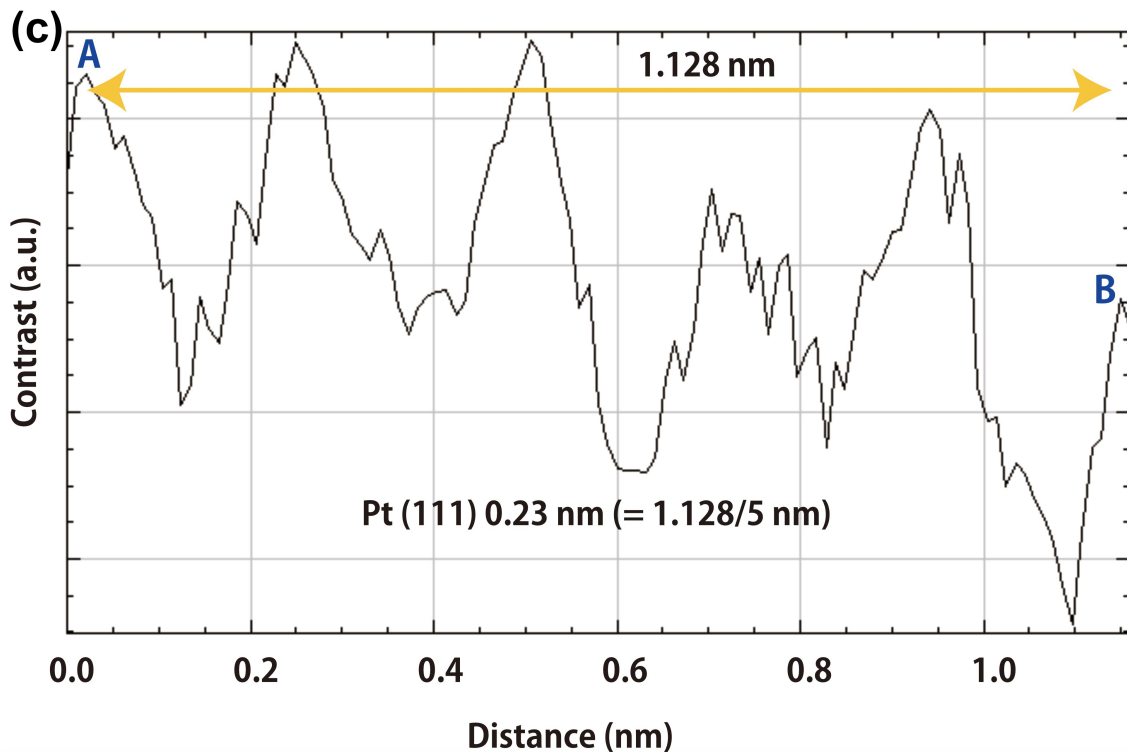

Supplement: d4na00818a3.pdf [file d4na00818a3.pdf]

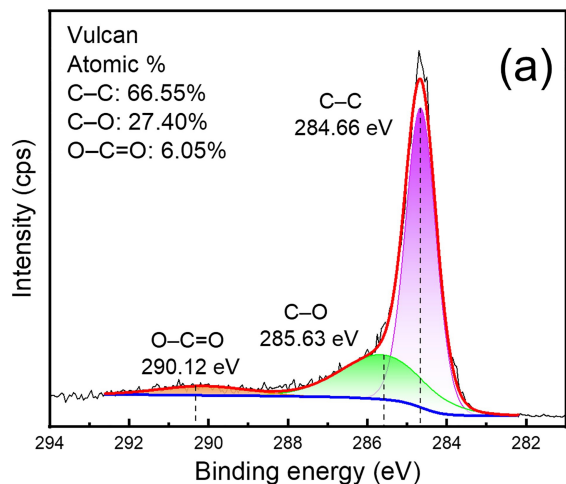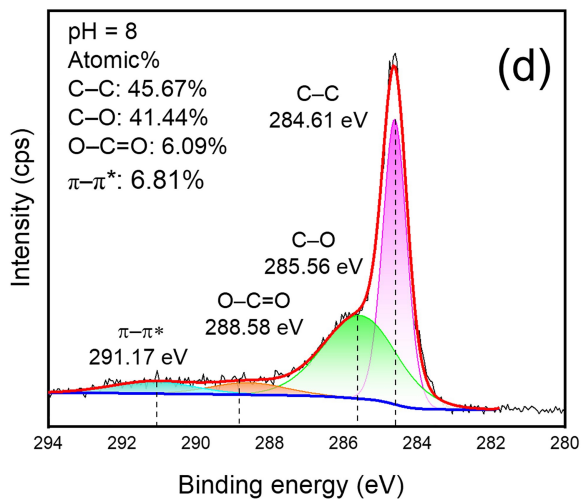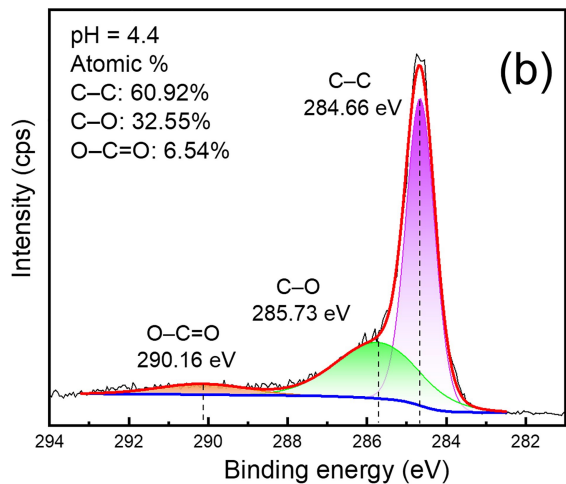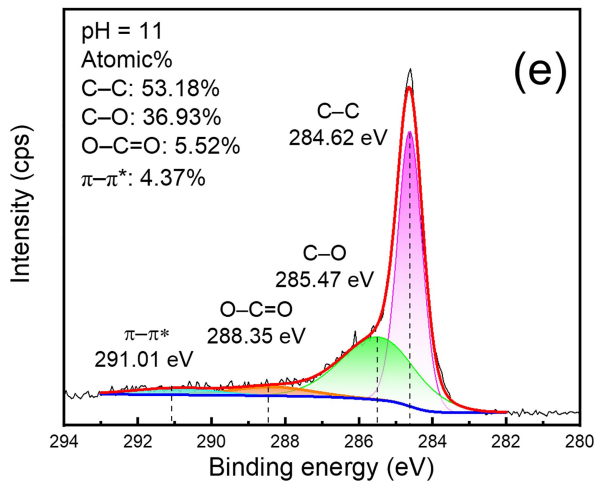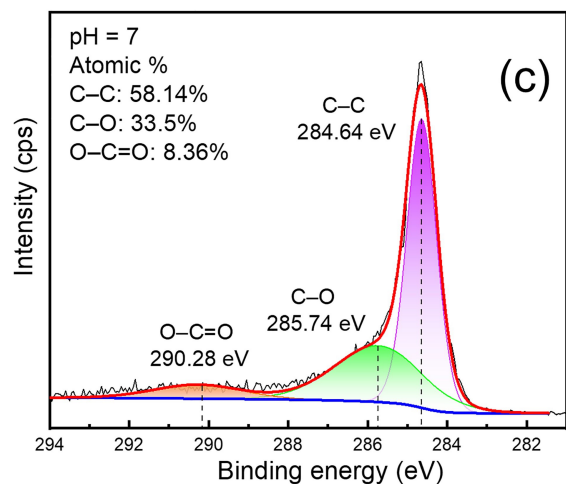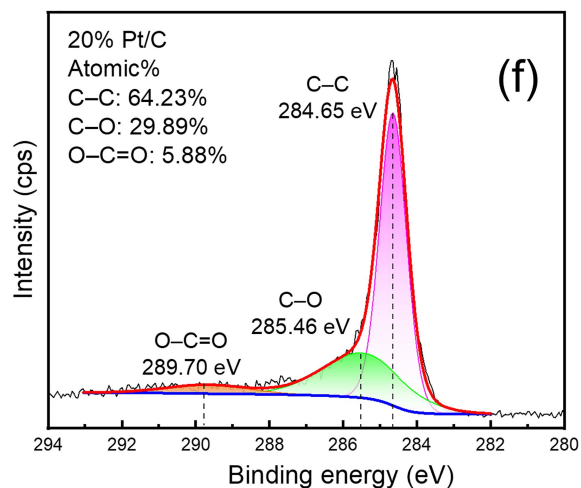

Supplement: d4na00818a4.pdf [file d4na00818a4.pdf]

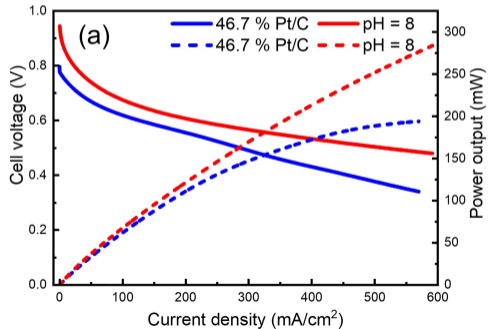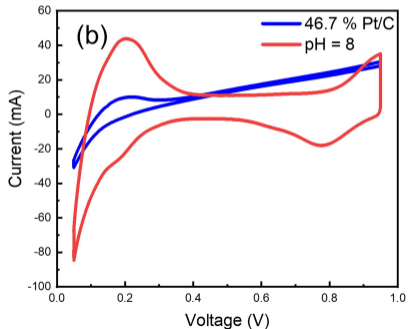

Supplement: d4na00818a5.pdf [file d4na00818a5.pdf]

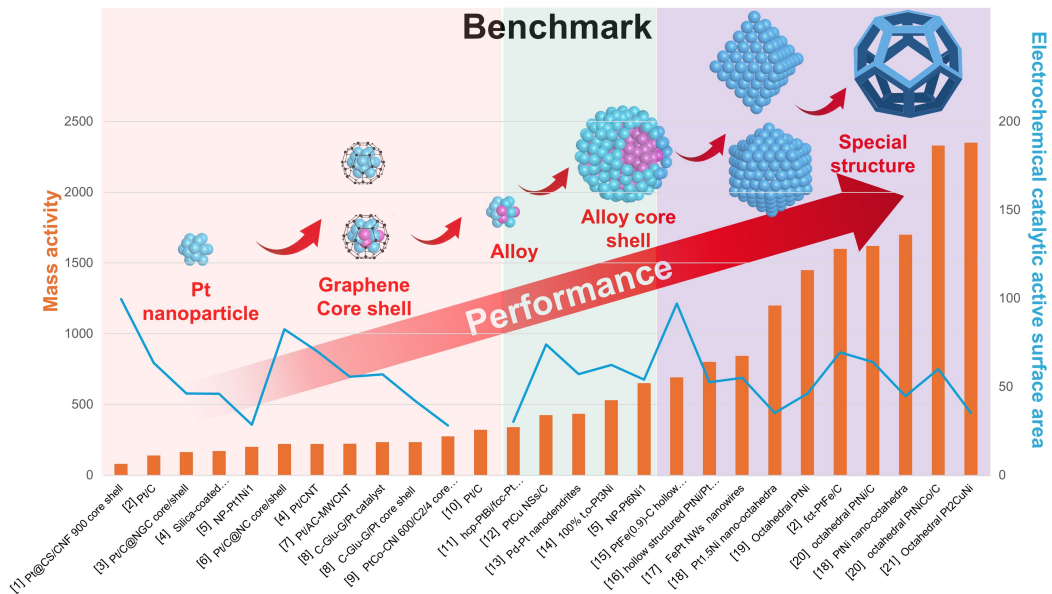

Supplement: d4na00818a6.pdf [file d4na00818a6.pdf]
